# Supplementary material for: Heart rate detection properties of dry-electrode ECG compared to conventional 3-lead gel-electrode ECG in newborns
Source: PubMed Central journal article supplement (PMC8088562; doi:10.1186/s13104-021-05576-x), 2021-05-01

**11. MSE NeoBeat = 17.28. MSE Reference monitor = 126.31**

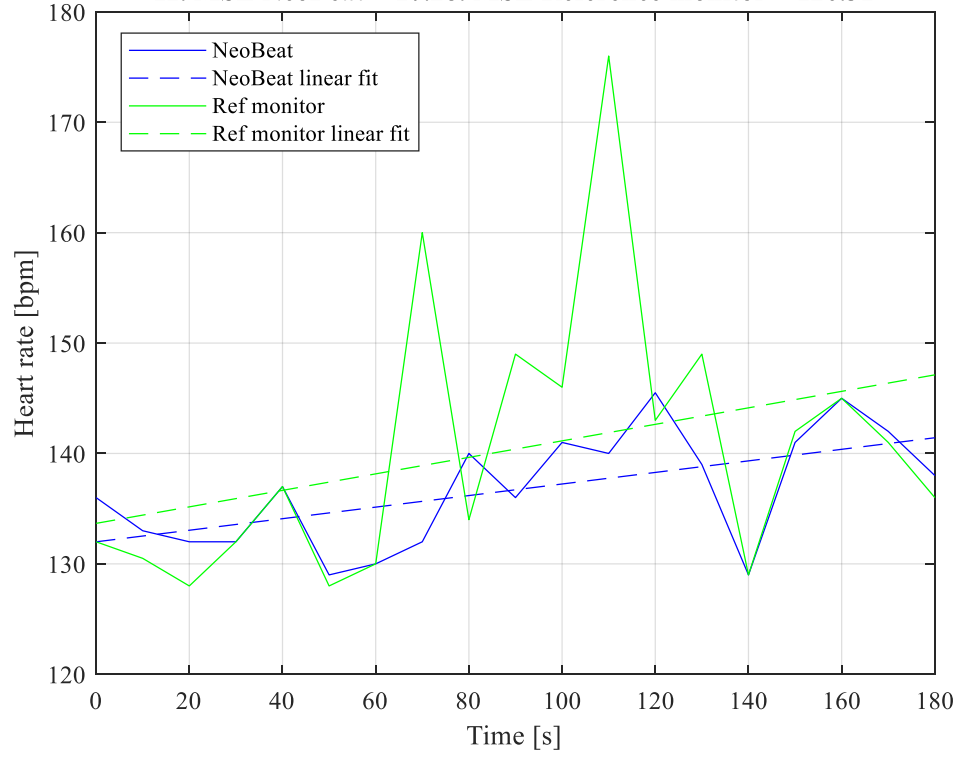

Supplement: 13104_2021_5576_MOESM1_ESM.pdf [file 13104_2021_5576_MOESM1_ESM.pdf]
